# Supplementary figures and images for: Age-related macular degeneration: Epidemiology, genetics, pathophysiology, diagnosis, and targeted therapy
Source: PubMed Central journal article supplement — Genes Dis. 2021 Feb 27;9(1):62–79. doi: 10.1016/j.gendis.2021.02.009 (PMC8720701; doi:10.1016/j.gendis.2021.02.009), 2021-02-27

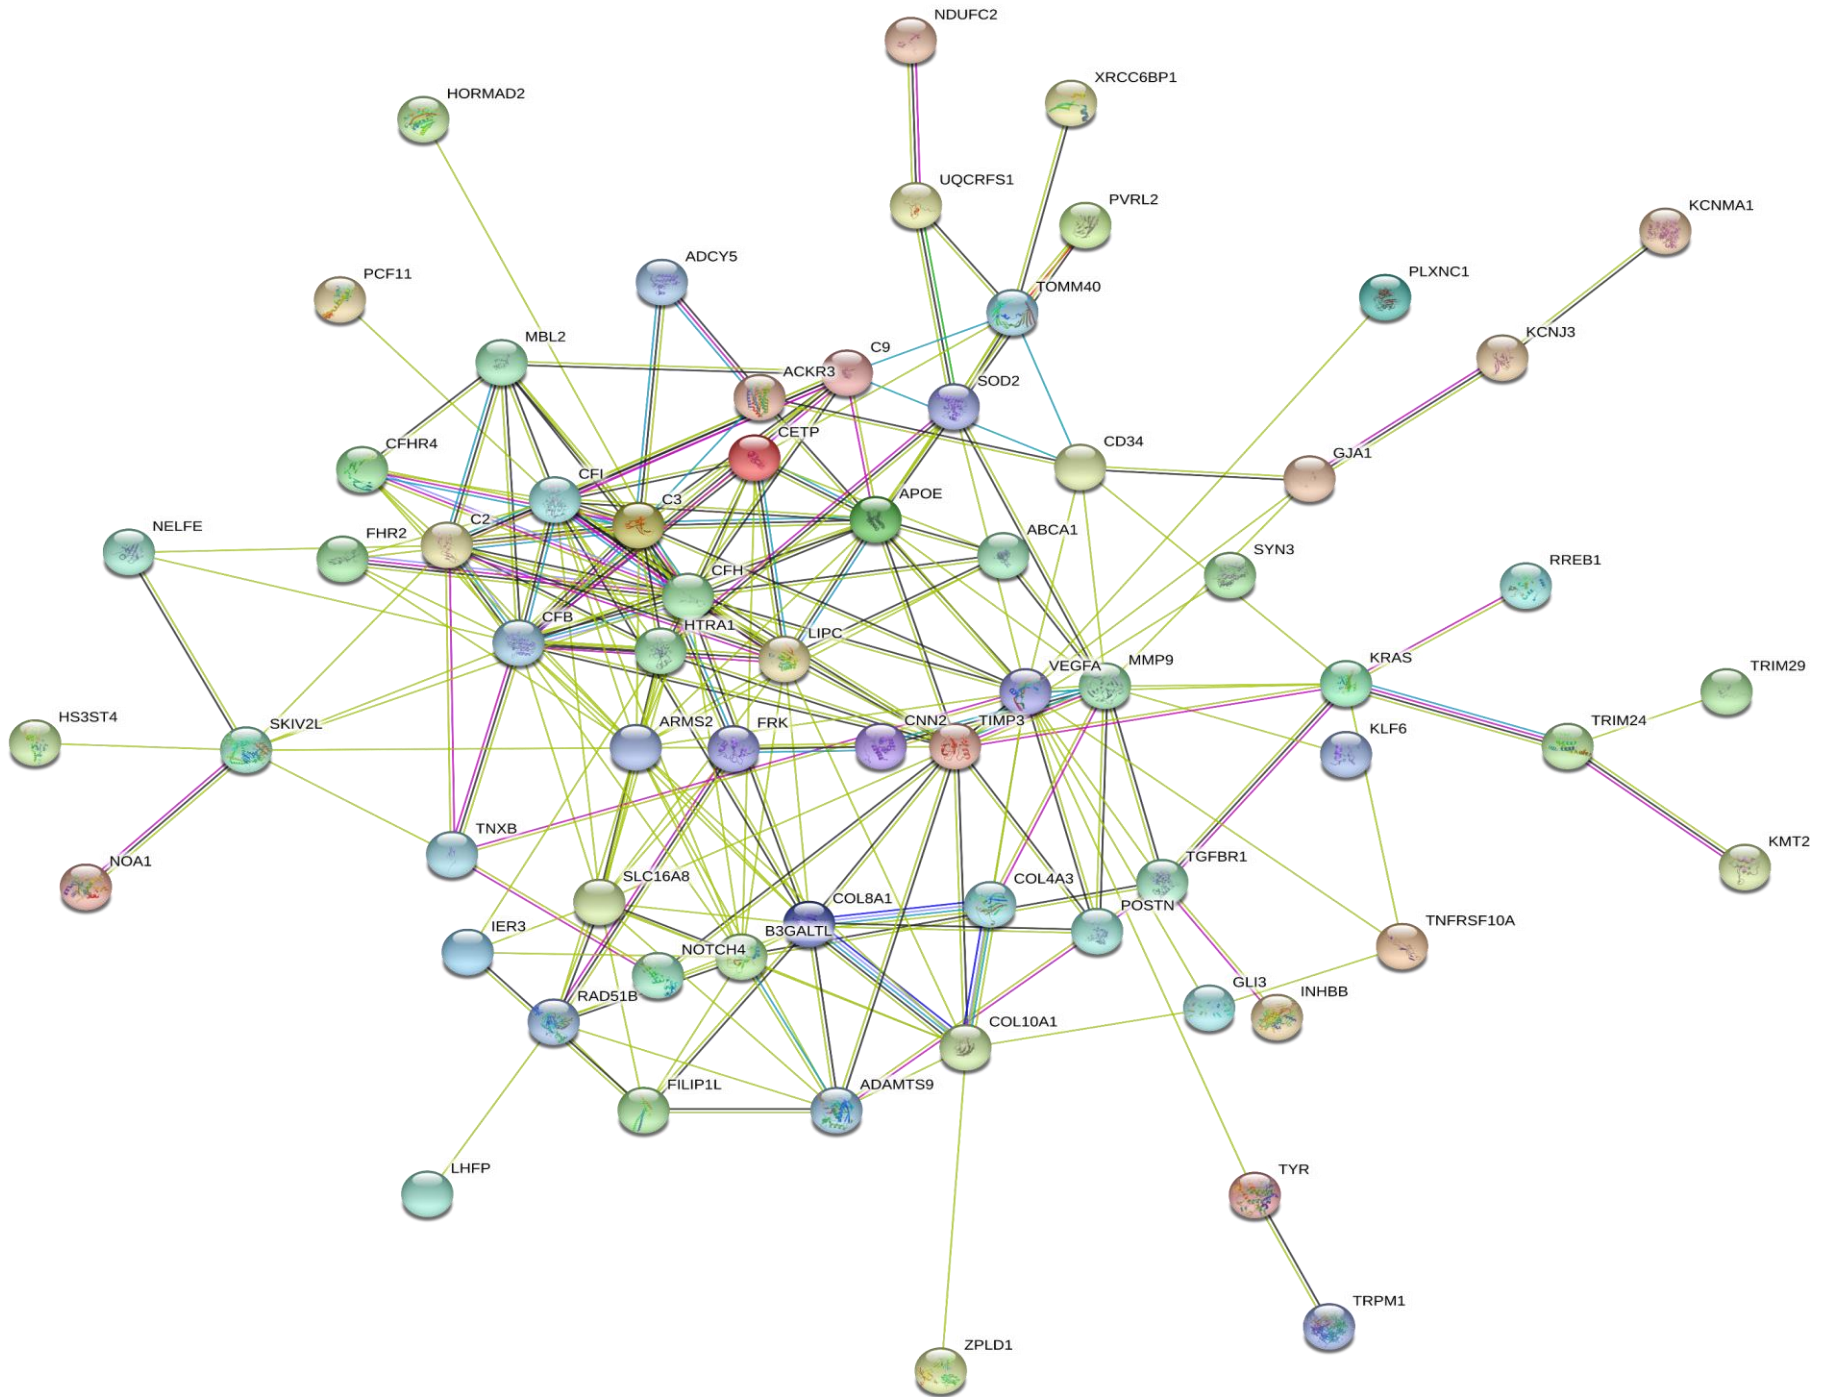

Supplement: mmc1.pdf [file mmc1.pdf]
